# Supplementary material for: Synthesis of vertically aligned single-crystalline α-(FexCr1−x)2O3 nanostructure arrays by microwave irradiation and their growth mechanism
Source: Royal Society of Chemistry journal article supplement (doi:10.1039/c000970a), 2010-01-01
Supplement: c000970a.pdf [file c000970a.pdf]

## Electronic Supplementary Information

### Synthesis of vertically aligned single-crystalline $\alpha$ -(Fe<sub>x</sub>Cr<sub>1-x</sub>)<sub>2</sub>O<sub>3</sub> nanostructure arrays by microwave irradiation and their growth mechanism

Seungho Cho and Kun-Hong Lee

Department of Chemical Engineering, Pohang University of Science and Technology (POSTECH), San 31, Hyoja-Dong, Nam-Gu, Pohang, Gyungbuk, Korea, 790-784  
E-mail: ce20047@postech.ac.kr

We used XPS to examine the oxidation states of Fe and Cr in the products. The Fe 2p<sub>3/2</sub> and 2p<sub>1/2</sub> electron binding energies are shown in Figure S1(a), which are very similar to the values reported in the literature.<sup>S1</sup> The binding energies at 710.8 ± 0.1 and 724.4 ± 0.1 eV were characteristic of the doublet from the Fe 2p<sub>3/2</sub> and Fe 2p<sub>1/2</sub> core-level electrons, respectively. No Fe<sup>2+</sup> shakeup satellite peaks at about 715.5 eV were observed.<sup>S2</sup> Thus, the Fe 2p spectrum was attributed to Fe<sup>3+</sup>. The Cr 2p spectrum (Figure S2(b), 2p<sub>3/2</sub>) was fit to Cr<sup>3+</sup> at 577.3 eV while no other chromium signals were observed for the nanostructures.<sup>S3,S4</sup> Therefore, the chemical states of Fe and Cr in the oxide nanostructures were mainly assigned to Fe<sup>3+</sup> and Cr<sup>3+</sup>.

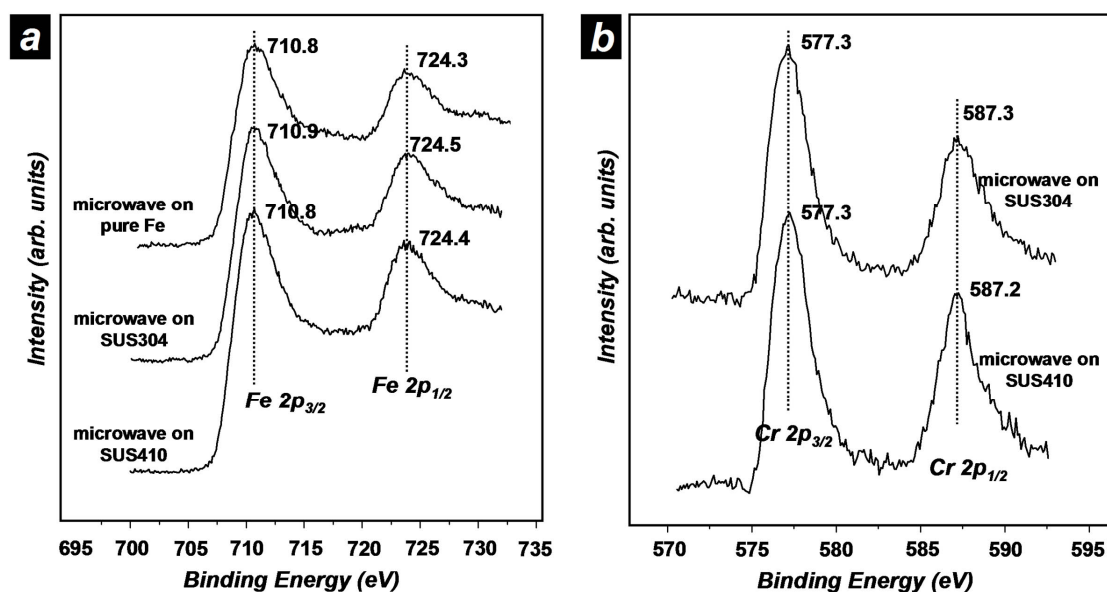

**Fig. S1.** XPS spectra of nanostructures synthesized from 1000 W microwave irradiation on substrates (pure iron, SUS304, SUS410) for 7 min: (a) Fe 2p XPS spectrum; (b) Cr 2p XPS spectrum.

#### References

- S1 H. Srivastava, P. Tiwari, A. K. Srivastava and R. V. Nandedkar, *J. Appl. Phys.*, 2007, **102**, 054303.  
S2 S. Gota, E. Guiot, M. Henriot and M. Gautier-Soyer, *Phys. Rev. B*, 1999, **60**, 14387.  
S3 R. K. Brow, *J. Am. Ceram. Soc.*, 1987, **70**, C129.  
S4 I. Ikemoto, K. Ishii, S. Kinoshita, H. Kuroda, M. A. Alariofranco and J. M. Thomas, *J. Solid State Chem.*, 1976, **17**, 425.

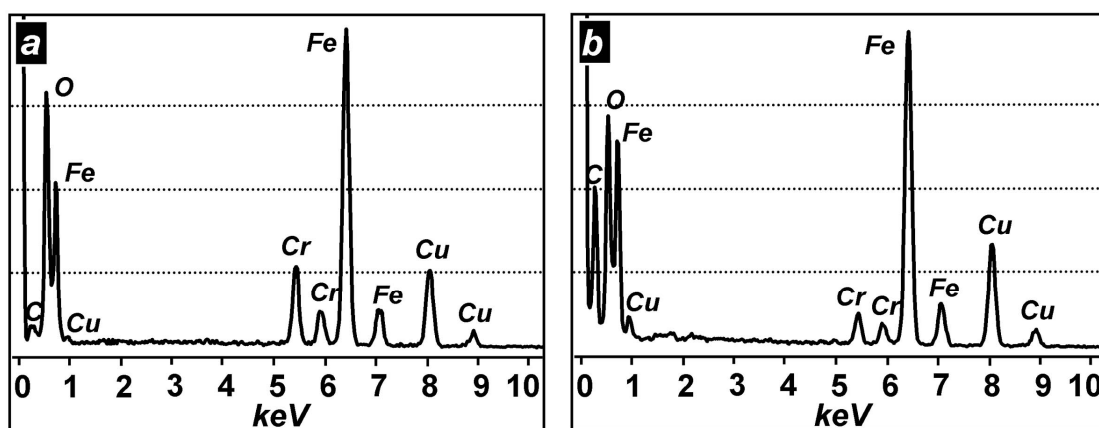

**Fig. S2.** EDX patterns of the nanostructures: (a) the nanostructures synthesized by 1000 W microwave irradiation on SUS304 for 7 min. (b) the nanostructure synthesized by 1000 W microwave irradiation on SUS410 for 7 min.
